# Supplementary material for: Efficient microwave synthesis of novel aromatic esters catalyzed by zirconia and its modified forms: a kinetic study
Source: Royal Society of Chemistry journal article supplement (doi:10.1039/c5ra20430e), 2015-01-01

# **<sup>1</sup>H and <sup>13</sup>C NMR spectra**

NUCLEUS : <sup>1</sup>H  
FREQ (MHz) : 399.63  
AT (sec) : 2.27  
SW (ppm) : 18.08  
RD (sec) : 1.00  
PW (µsec) : 6.65  
Scans : 12  
Solvent : cdcl3  
Data Points : 32768  
LB (Hz) : 1.00  
TEMP (K) : 303.15  
EXP : s2pul  
DATE : Jul 14 2014  
System : VNMR5\_400

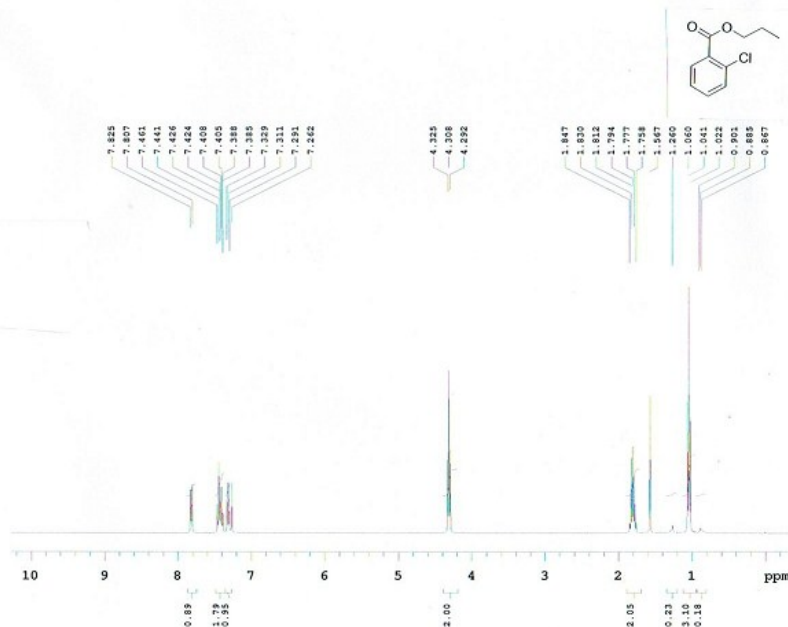

CONFIDENTIAL....

NUCLEUS : <sup>13</sup>C  
FREQ (MHz) : 100.50  
AT (sec) : 1.28  
SW (ppm) : 253.84  
RD (sec) : 1.00  
PW (µsec) : 5.20  
Scans : 5000  
Solvent : cdcl3  
Data Points : 65536  
LB (Hz) : 2.00  
TEMP (K) : 303.15  
EXP : s2pul  
DATE : May 22 2015  
System : VNMR5\_400

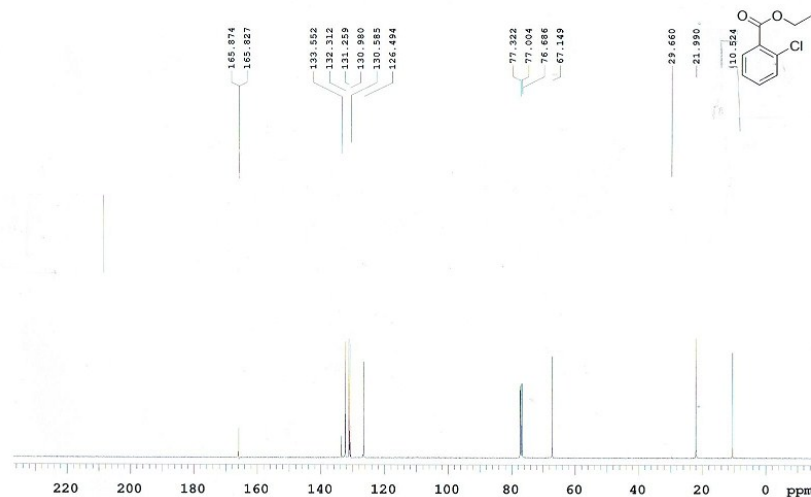

NUCLEUS : H1  
 FREQ (MHz) : 399.63  
 AT (sec) : 2.27  
 SW (ppm) : 18.08  
 RD (sec) : 1.00  
 PW (usec) : 6.65  
 Scans : 32  
 Solvent : cdcl3  
 Data Points : 32768  
 LB (Hz) : 1.00  
 TEMP (K) : 303.15  
 EXP : s2pul  
 DATE : Jul 8 2014  
 System : VNMR5\_400

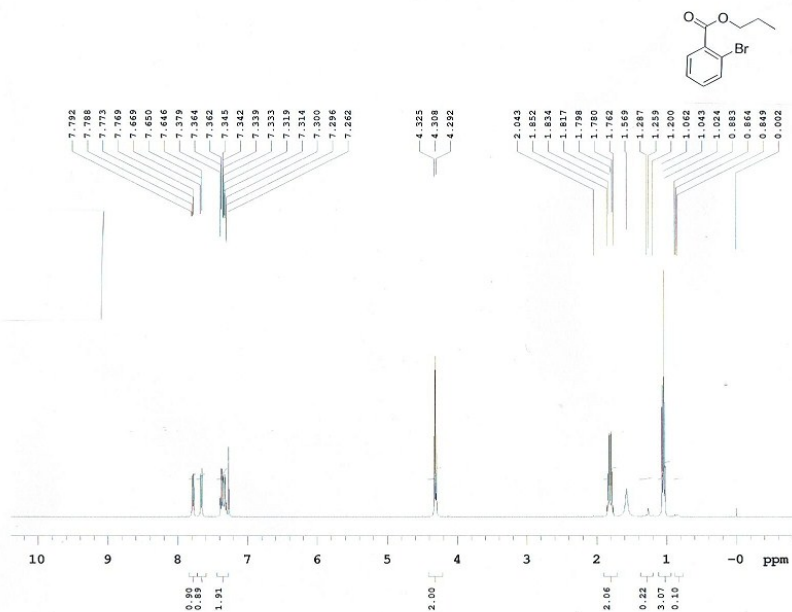

NUCLEUS : C13  
 FREQ (MHz) : 100.50  
 AT (sec) : 1.28  
 SW (ppm) : 253.84  
 RD (sec) : 1.00  
 PW (usec) : 5.20  
 Scans : 5000  
 Solvent : cdcl3  
 Data Points : 65536  
 LB (Hz) : 2.00  
 TEMP (K) : 303.15  
 EXP : s2pul  
 DATE : May 22 2015  
 System : VNMR5\_400

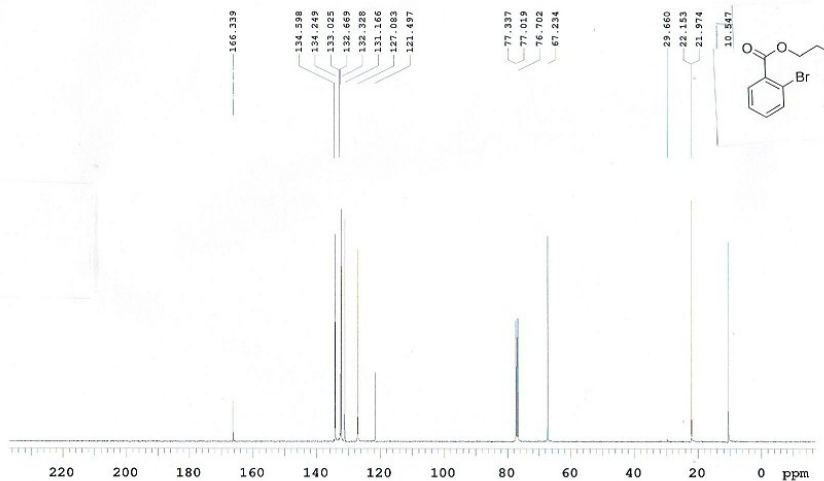

NUCLEUS : H1  
 FRQ (MHz) : 399.63  
 AT (sec) : 2.27  
 SW (ppm) : 15.00  
 RD (sec) : 1.00  
 PW (usec) : 6.65  
 Scans : 32  
 Solvent : cdcl3  
 Data Points : 32768  
 LB (Hz) : 2.00  
 TEMP (K) : 303.15  
 EXP : s2pul  
 DATE : Jul 8 2014  
 System : VNMR5-400

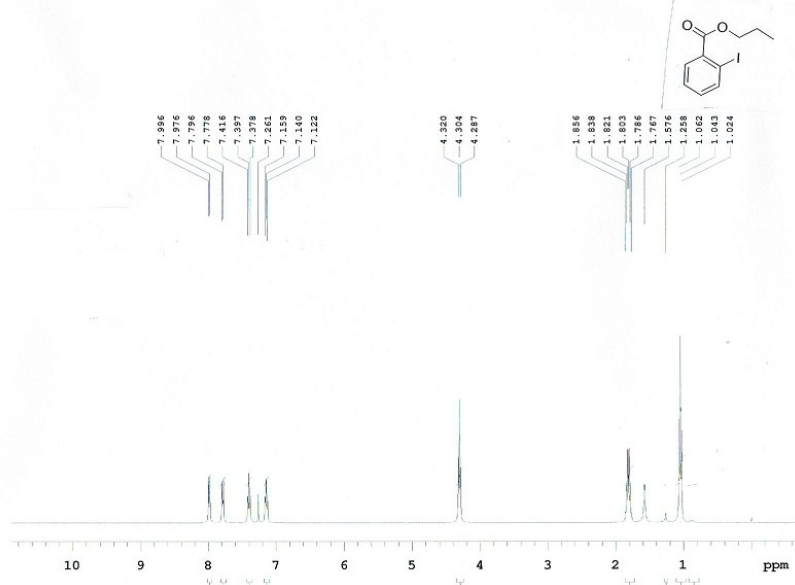

NUCLEUS : C13  
 FRQ (MHz) : 100.62  
 AT (sec) : 1.28  
 SW (ppm) : 231.84  
 RD (sec) : 1.00  
 PW (usec) : 9.20  
 Scans : 5000  
 Subscan : 1000  
 Data Points : 85536  
 LB (Hz) : 2.00  
 TEMP (K) : 303.15  
 EXP : zgpg30  
 DATE : May 28 2005  
 System : VNMR5-400

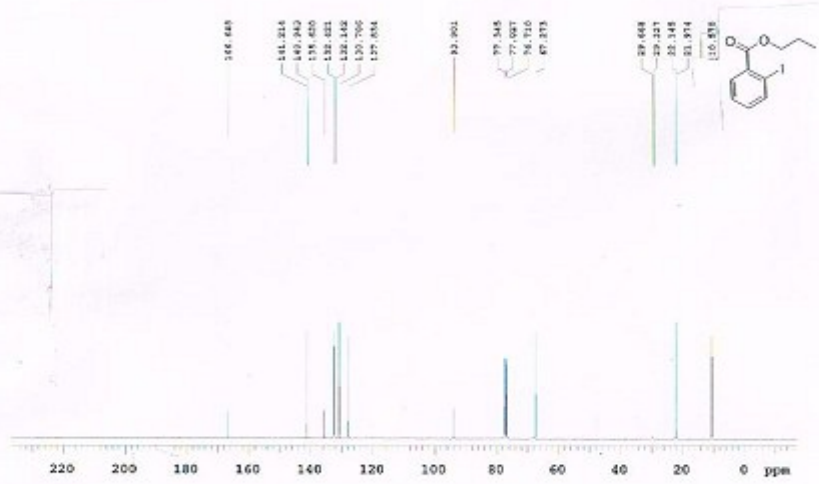

CCOC(=O)c1ccccc1F

7.852  
7.833  
7.735  
7.712  
7.442  
7.422  
7.408  
7.388  
7.361  
7.235  
7.229  
4.359  
4.293  
4.276  
1.826  
1.809  
1.809  
1.791  
1.773  
1.756  
1.556  
1.260  
1.054  
1.036  
1.018  
0.002

ppm

Chemical structure: CCOC(=O)c1ccc(F)cc1

<sup>13</sup>C NMR peaks (ppm):

- 165.463
- 165.432
- 163.759
- 161.303
- 132.746
- 132.669
- 129.826
- 129.849
- 125.223
- 125.200
- 119.878
- 119.661
- 116.484
- 116.260
- 77.322
- 77.004
- 76.686
- 66.839
- 31.535
- 22.594
- 22.021
- 14.018
- 10.392

NUCLEUS : H1  
 FRQ (MHz) : 399.63  
 AT (sec) : 2.27  
 SW (ppm) : 18.08  
 RD (sec) : 1.00  
 PW (usec) : 6.65  
 Scans : 32  
 Solvent : cdc13  
 Data Points : 32768  
 LB (Hz) : 2.00  
 TEMP (K) : 303.15  
 EXP : s2pul  
 DATE : Aug 22 2014  
 System : VNMR5\_400

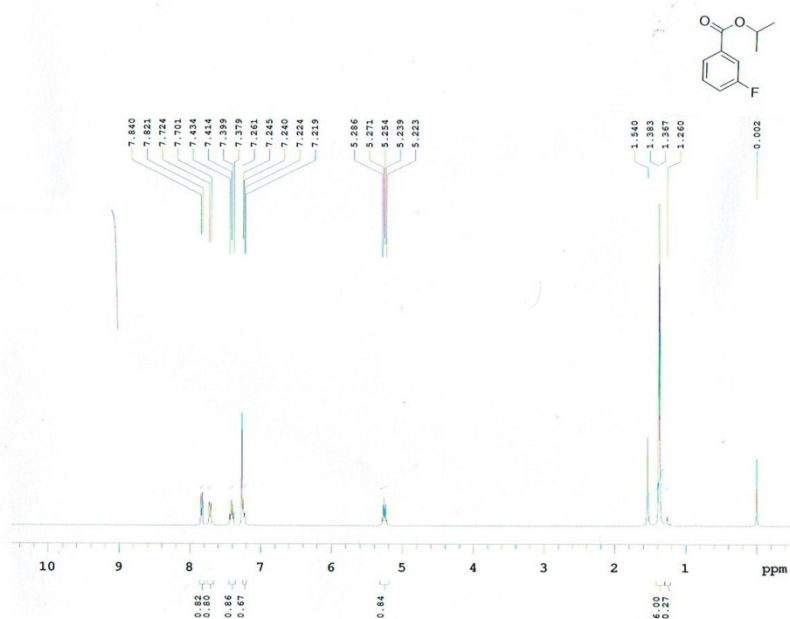

NUCLEUS : C13  
 FRQ (MHz) : 100.50  
 AT (sec) : 1.28  
 SW (ppm) : 253.84  
 RD (sec) : 1.00  
 PW (usec) : 5.20  
 Scans : 2000  
 Solvent : cdc13  
 Data Points : 65536  
 LB (Hz) : 4.00  
 TEMP (K) : 303.15  
 EXP : s2pul  
 DATE : May 27 2015  
 System : VNMR5\_400

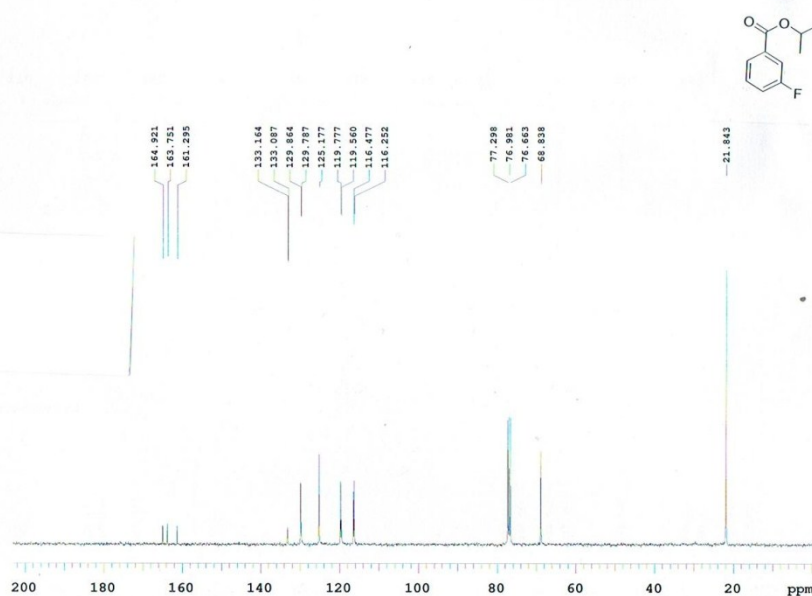

NUCLEUS : H1  
 FRQ (MHz) : 399.63  
 AT (sec) : 2.27  
 SW (ppm) : 18.08  
 RD (sec) : 1.00  
 PW (usec) : 6.65  
 Scans : 32  
 Solvent : cdcl3  
 Data Points : 32768  
 LB (Hz) : 2.00  
 TEMP (K) : 303.15  
 EXP : s2pul  
 DATE : Aug 28 2014  
 System : VNMR5\_400

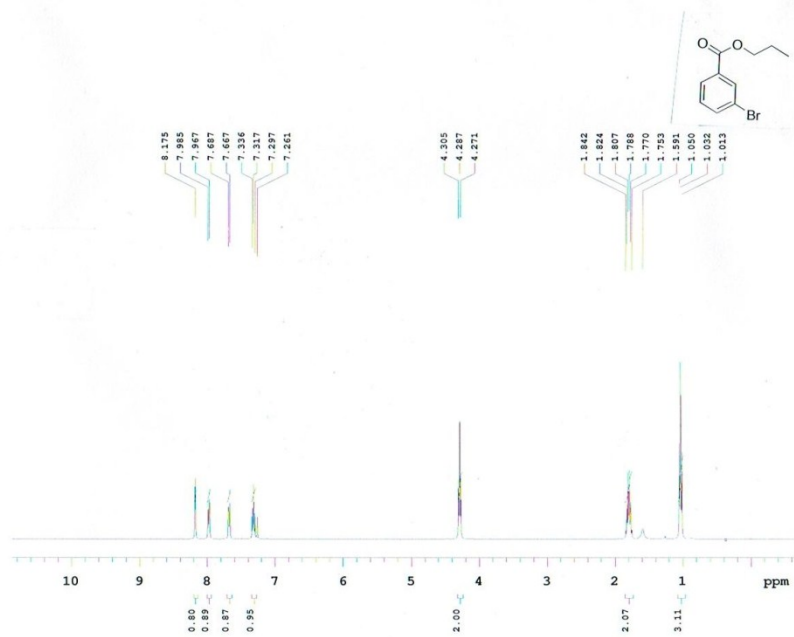

NUCLEUS : C13  
 FRQ (MHz) : 100.50  
 AT (sec) : 1.28  
 SW (ppm) : 253.84  
 RD (sec) : 1.00  
 PW (usec) : 5.05  
 Scans : 5000  
 Solvent : cdcl3  
 Data Points : 65536  
 LB (Hz) : 2.00  
 TEMP (K) : 303.15  
 EXP : s2pul  
 DATE : May 27 2015  
 System : VNMR5\_400

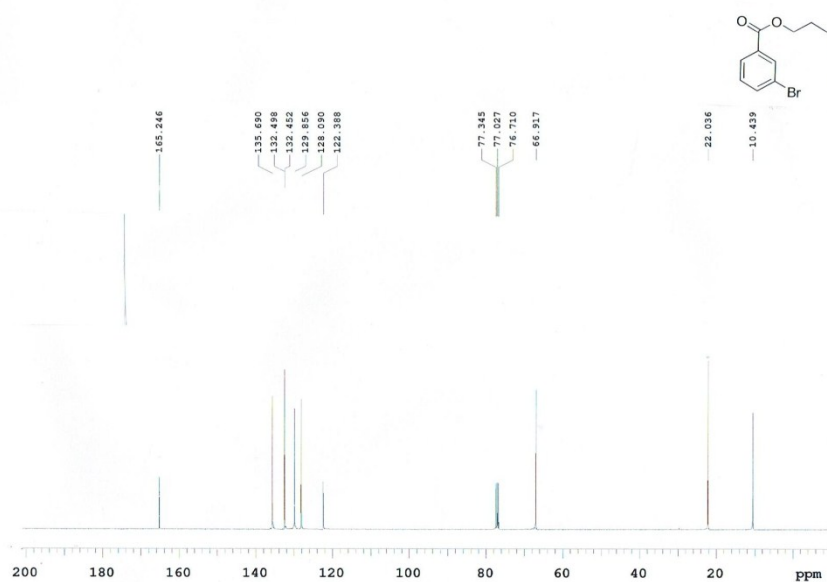

NUCLEUS : H1  
 FRQ (MHz) : 399.63  
 AT (sec) : 2.27  
 SW (ppm) : 18.08  
 RD (sec) : 1.00  
 PW (usec) : 6.65  
 Scans : 32  
 Solvent : cdcl3  
 Data Points : 32768  
 LB (Hz) : 2.00  
 TEMP (K) : 303.15  
 EXP : s2pul  
 DATE : Oct 1 2014  
 System : VNMRS\_400

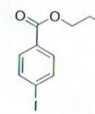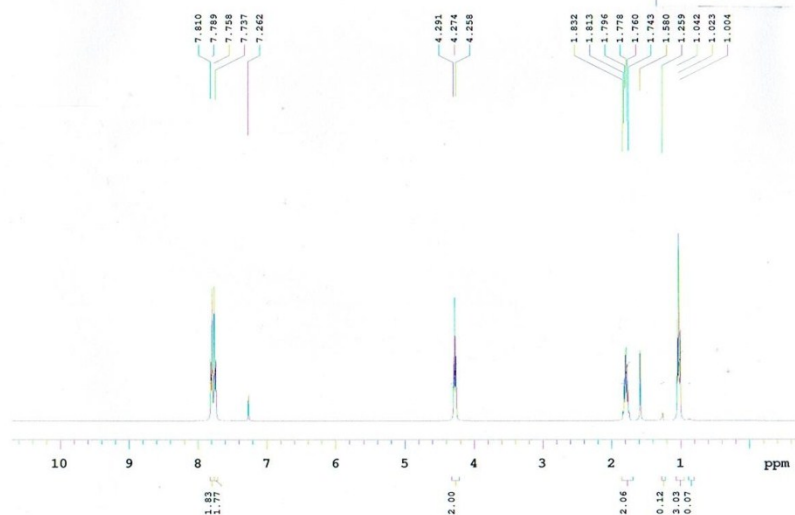

NUCLEUS : C13  
 FRQ (MHz) : 100.50  
 AT (sec) : 1.28  
 SW (ppm) : 253.84  
 RD (sec) : 1.00  
 PW (usec) : 5.05  
 Scans : 5000  
 Solvent : cdcl3  
 Data Points : 65536  
 LB (Hz) : 2.00  
 TEMP (K) : 303.15  
 EXP : s2pul  
 DATE : May 27 2015  
 System : VNMRS\_400

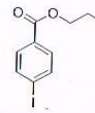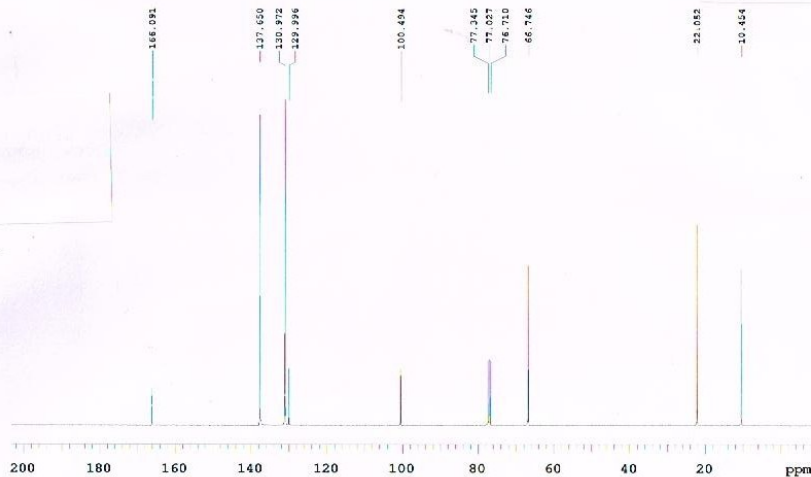

Supplement: c5ra20430e1.pdf [file c5ra20430e1.pdf]
